# Supplementary material
Source: PubMed Central journal article supplement (PMC3076943)

Fig. S1

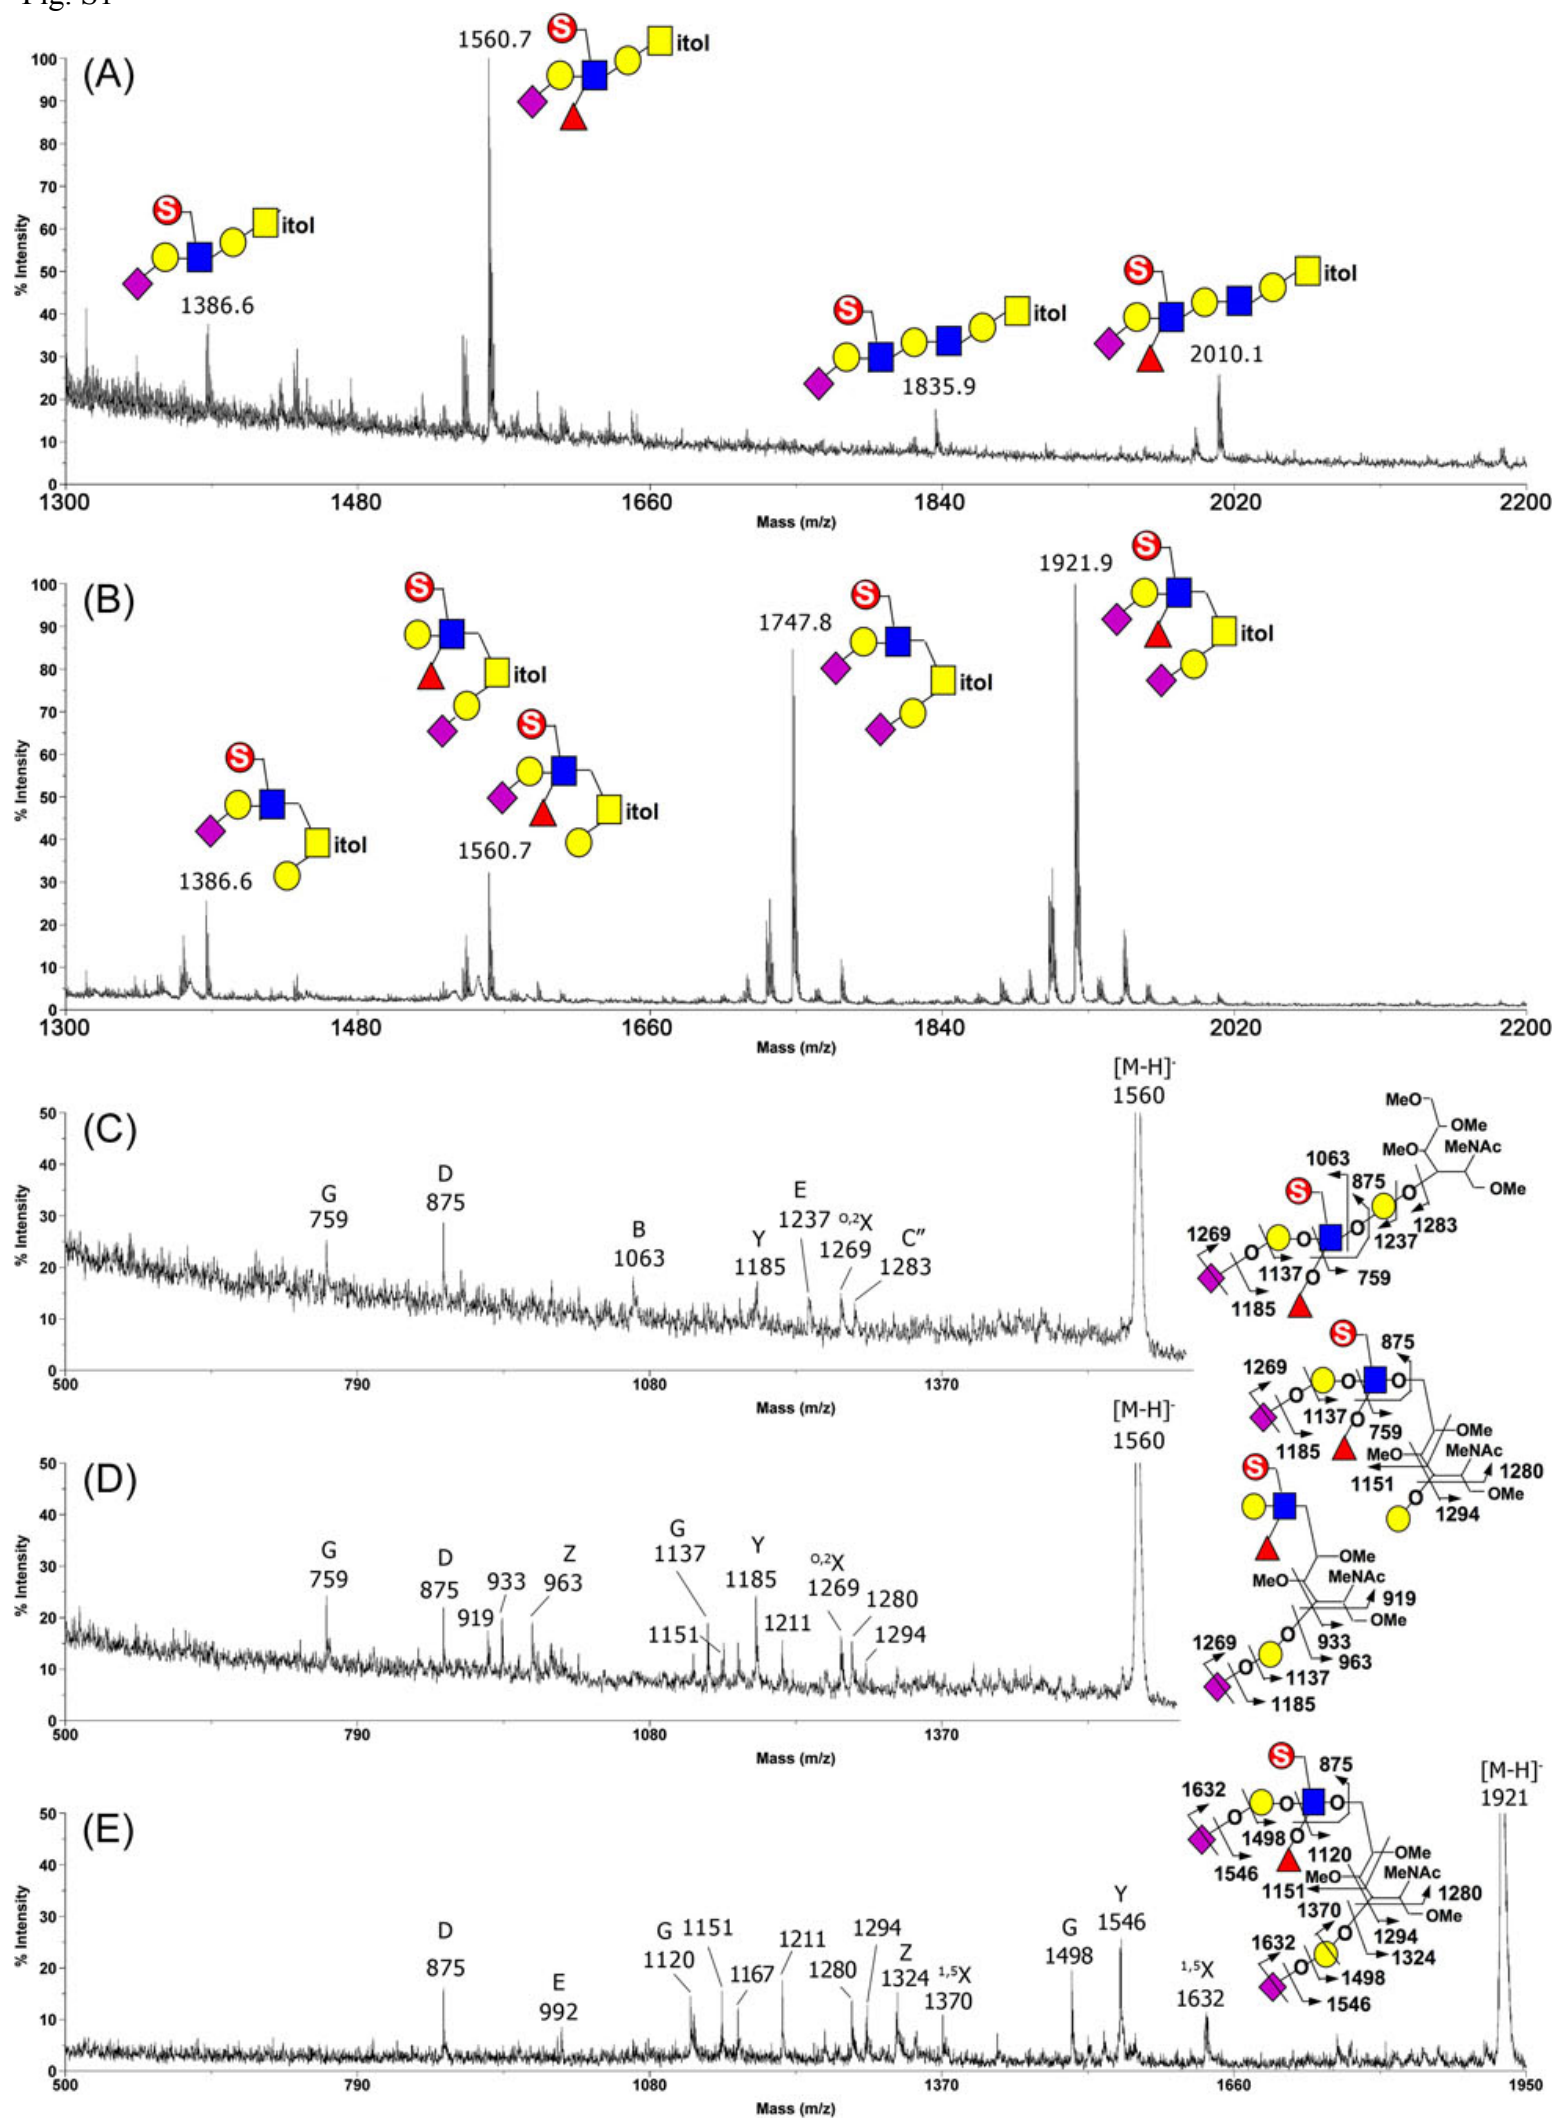

Fig. S2

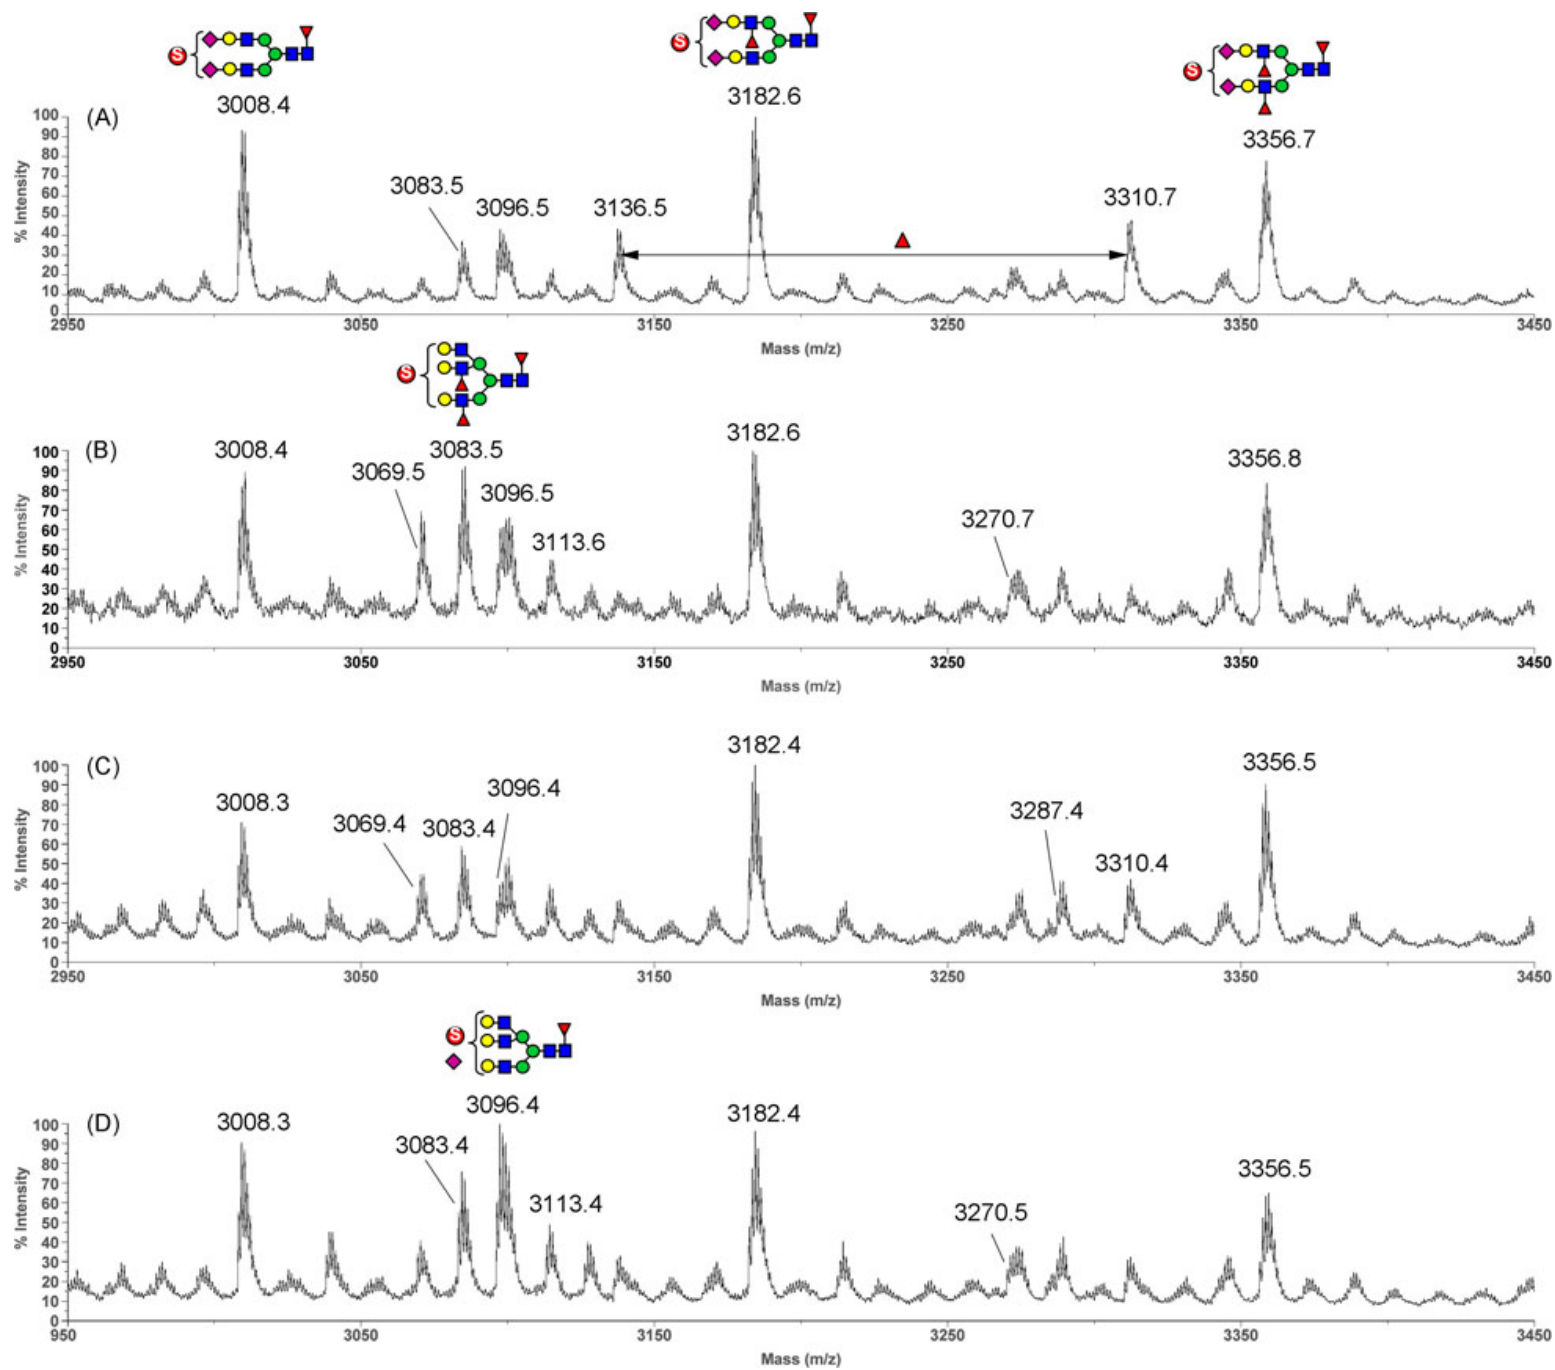

Fig. S3

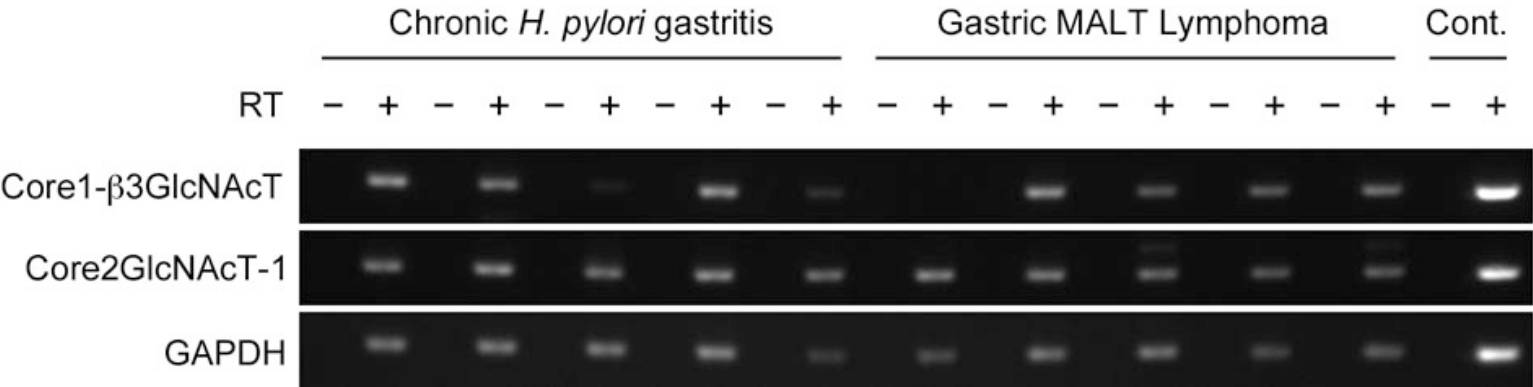

Supplement: NIHMS261334-supplement-Figs_S1-S3.pdf [file NIHMS261334-supplement-Figs_S1-S3.pdf]
